# Supplementary material for: Transcytosis-mediated anterograde transport of TrkA receptors is necessary for sympathetic neuron development and function
Source: PubMed Central journal article supplement — Proc Natl Acad Sci U S A. 2023 Feb 2;120(6):e2205426120. doi: 10.1073/pnas.2205426120 (PMC9963894; doi:10.1073/pnas.2205426120), 2023-02-02
Supplement: pnas.2205426120.sapp.pdf [file pnas.2205426120.sapp.pdf]

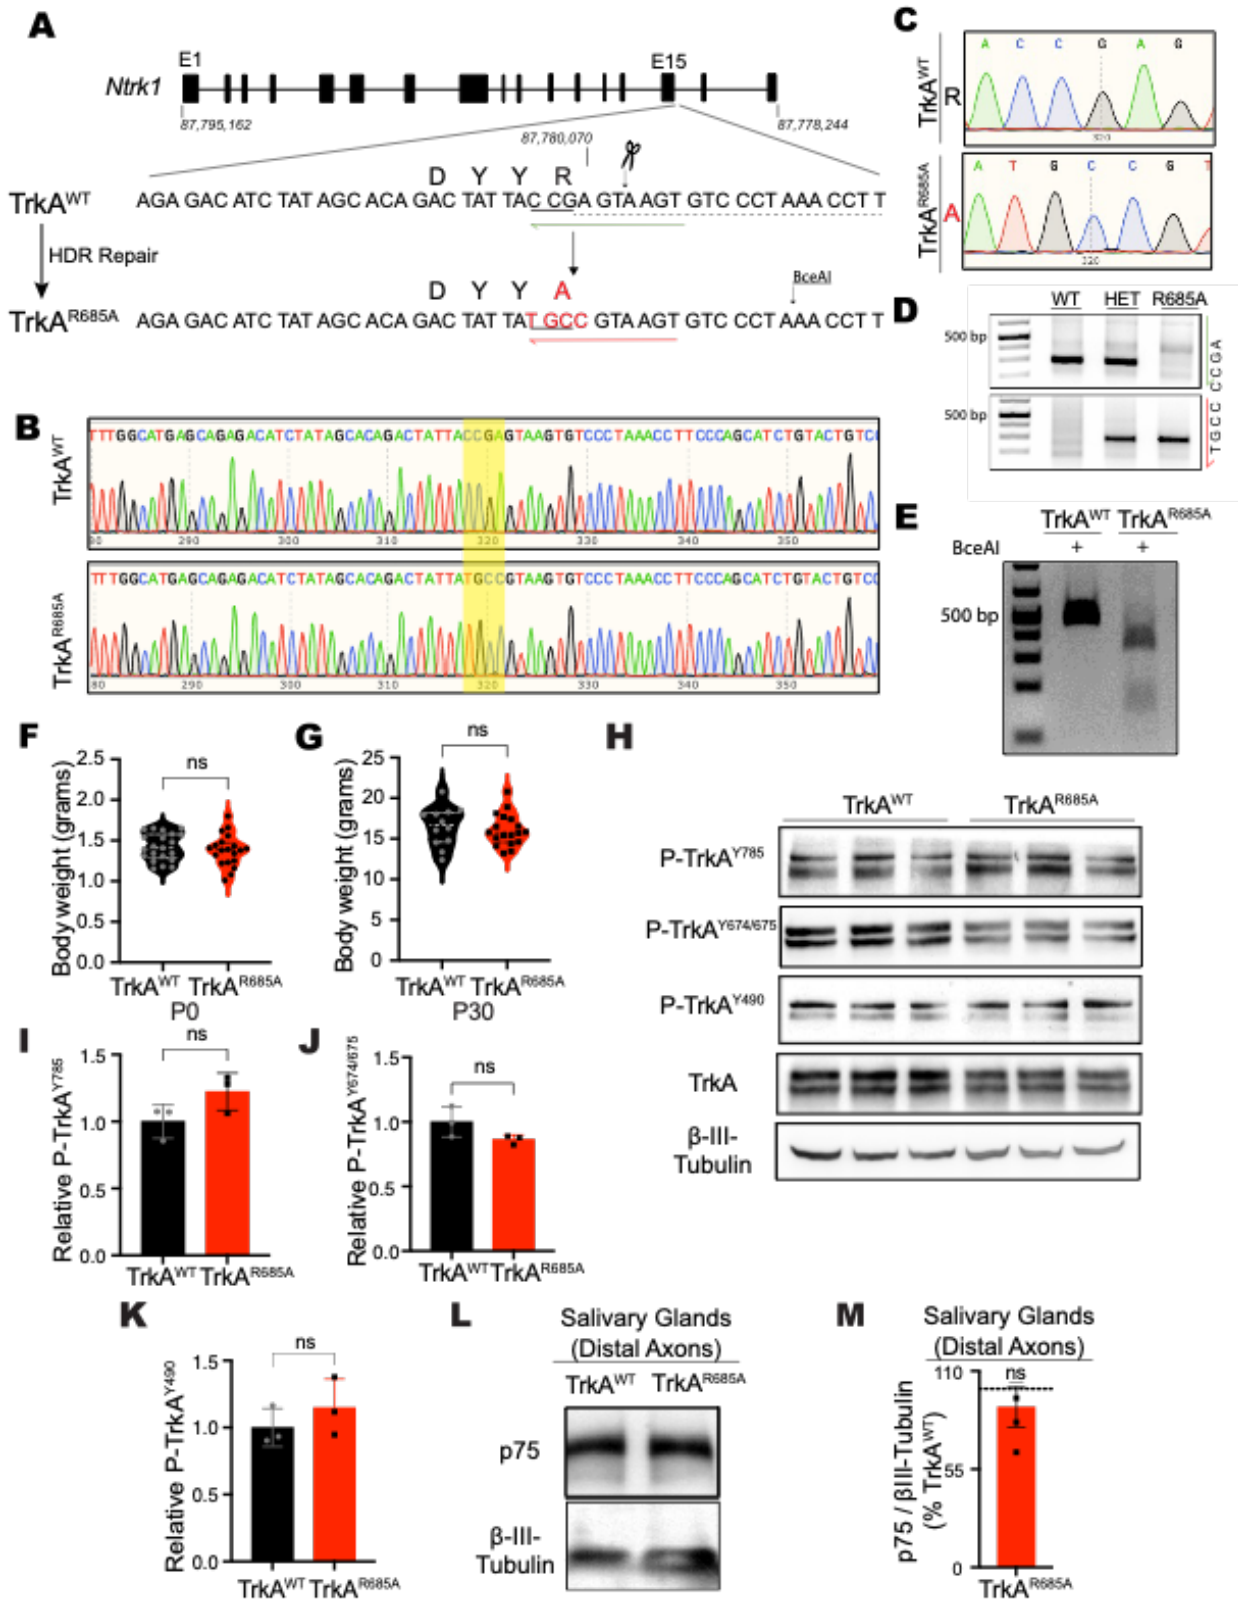

Supplemental Figure S1. Generation of TrkA<sup>R685A</sup> knock-in mice. Related to Figure 1.

**(A)** Schematic for generation of TrkA<sup>R685A</sup> knock-in mice. The top row shows the TrkA (*Ntrk1*) gene structure. The middle row shows the coding sequence for PTP1B interaction motif (DY<sup>Y</sup>R) at exon 15 in the TrkA<sup>WT</sup> allele and the Cas9 target region. Target sequence for gRNA is indicated by dashed underline, and the PAM site is indicated by solid underline. The bottom row shows the coding sequence in the TrkA<sup>R685A</sup> allele after homology-directed repair (HDR). The altered nucleotide sequence, TGCC, and the corresponding amino acid, A, are shown in red. A silent C > T mutation destroys the original PAM sequence and creates a novel BceAI restriction site for Restriction fragment length polymorphism (RFLP) analysis. Green arrow (TrkA<sup>WT</sup> allele) and red arrow (TrkA<sup>R685A</sup> allele) indicate allele-specific primers for PCR genotyping. **(B)** PCR genotyping results. A common forward primer and allele-specific reverse primers result in a band of 287 bp for TrkA<sup>WT</sup> and TrkA<sup>R685A</sup>. **(C)** Identification of TrkA<sup>R685A</sup> knock-in animals via RFLP analysis using BceAI restriction digest. TrkA<sup>WT</sup> band size: 467 bp. TrkA<sup>R685A</sup> band sizes: 367bp and 100bp. **(D)** Sanger-sequencing analysis of founder mice confirms genetic modification to TrkA<sup>R685A</sup>. **(E)** Sequencing of TrkA<sup>WT</sup> and TrkA<sup>R685A</sup> alleles shows preservation of surrounding nucleotides. **(F, G)** TrkA<sup>R685A</sup> animals have similar body weight as littermate controls at birth **(F)** and at postnatal day 30 **(G)**. ns=not significant, t-test. **(H)** Immunoblotting for P-TrkA<sup>Y785</sup>, P-TrkA<sup>Y674/Y675</sup>, P-TrkA<sup>Y490</sup>, and total TrkA in SCG lysates prepared from P0 TrkA<sup>R685A</sup> mice and littermate controls. Three replicates for each genotype are shown. P-TrkA blots were stripped and re-probed for TrkA and  $\beta$ -III-tubulin as loading control. **(I-K)** Densitometric quantification of P-TrkA<sup>Y785</sup> **(I)**, P-TrkA<sup>Y674/Y675</sup> **(J)**, and P-TrkA<sup>Y490</sup> **(K)** levels in TrkA<sup>R685A</sup> and control mice, normalized to total TrkA. Results are means  $\pm$  SEM from n=3 mice per genotype and expressed as fold-change relative to the TrkA<sup>WT</sup> condition. ns= not significant, t-test. **(L)** p75 protein levels in salivary gland lysates from E16.5 TrkA<sup>R685A</sup> embryos are unaltered compared to littermate controls. **(M)** Densitometric quantification of p75 protein level in salivary gland lysates normalized to  $\beta$ -III-tubulin. Results are

means  $\pm$  SEM from n=3 mice per genotype. p75 expression in mutant axons is represented as a % of p75 protein levels in control lysates. One-sample t-test, n.s.= not significant.

SCG

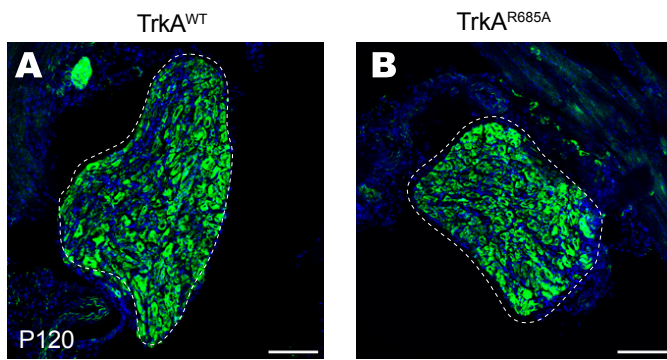

TH DAPI

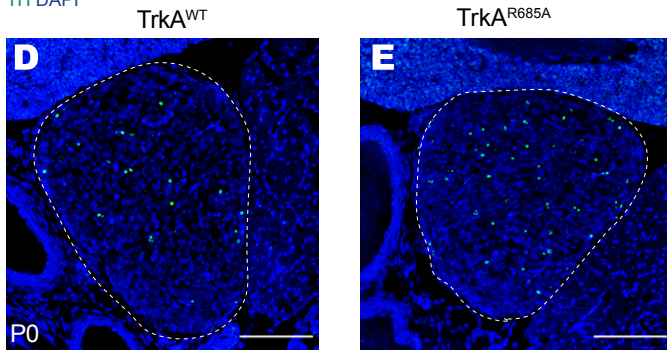

TUNEL DAPI

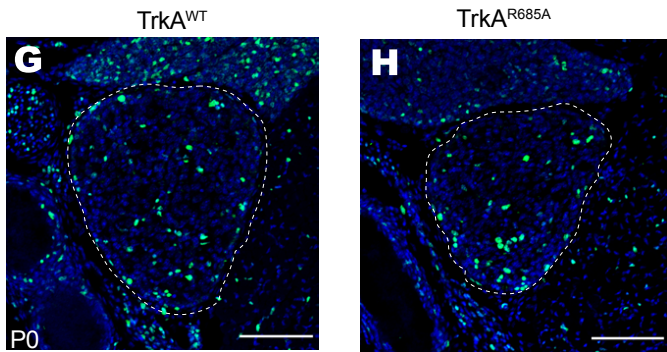

Ki67 DAPI

DRG

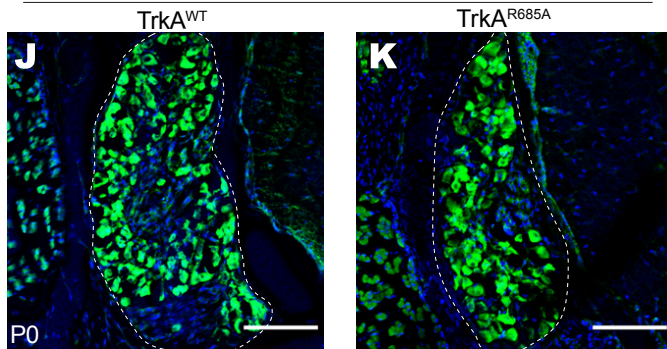

TrkA DAPI

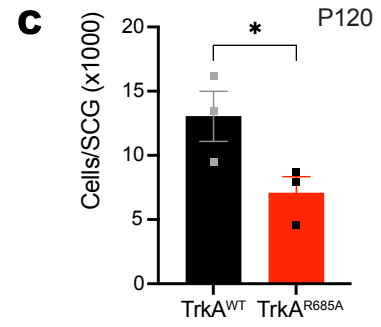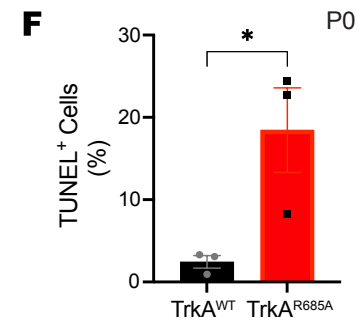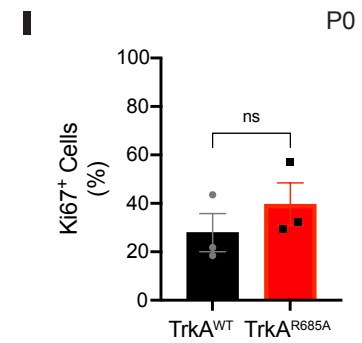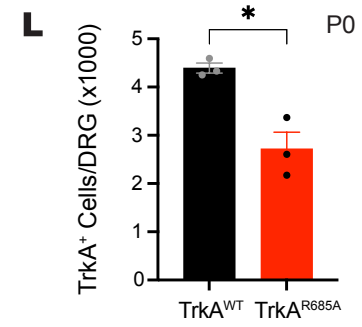

**Supplemental Figure S2. Neuron survival defects in TrkA<sup>R685A</sup> mice. Related to Figure 2.**

**(A-C)** TH immunostaining, and cell counts performed on Nissl-stained SCG tissue sections, shows reduced sympathetic neuron number in 4-month old TrkA<sup>R685A</sup> mice compared to litter-mate controls. Scale bar: 100  $\mu$ m. Results are means  $\pm$  SEM from n=3 mice per genotype, \*p<0.05, t-test. **(D-F)** TUNEL labeling shows increased cell death in P0 TrkA<sup>R685A</sup> SCGs compared to controls. Scale bar: 100  $\mu$ m. Results are mean  $\pm$  SEM from 3 mice per genotype and represented as % of TrkA<sup>WT</sup> values, \*p<0.05, t-test. **(G-I)** Cell proliferation is unaffected in P0 TrkA<sup>R685A</sup> SCG compared to ganglia from littermate controls as assessed by Ki67 immunostaining. Scale bar: 100  $\mu$ m. Results are mean  $\pm$  SEM from 3 mice per genotype and represented as % of TrkA<sup>WT</sup> values, \*n.s: not significant, t-test. **(J-L)** TrkA-positive sensory neurons are significantly reduced in T13 DRG from P0 TrkA<sup>R685A</sup> mice compared to litter-mate controls as assessed by TrkA immunostaining and neuronal counts. Nuclei are stained with DAPI (blue). Scale bar: 100  $\mu$ m. Results are means  $\pm$  SEM from n=3 mice per genotype, \* p<0.05, t-test.

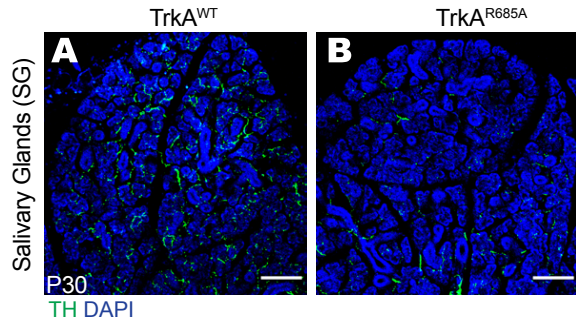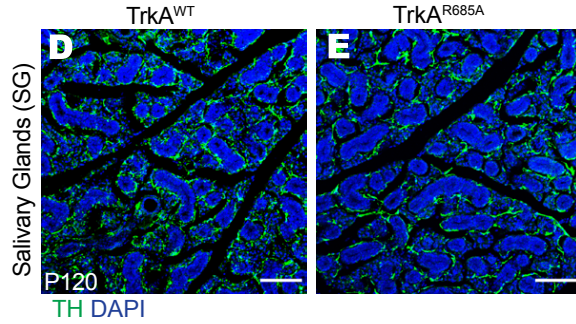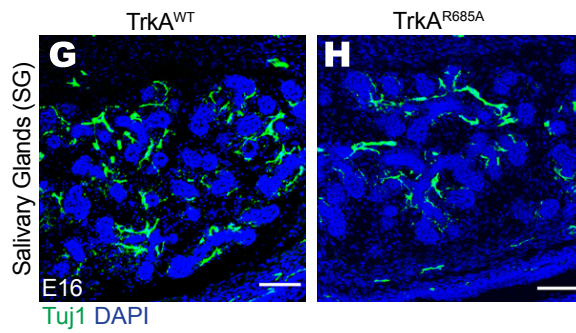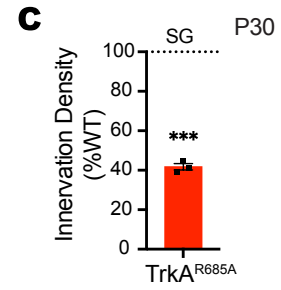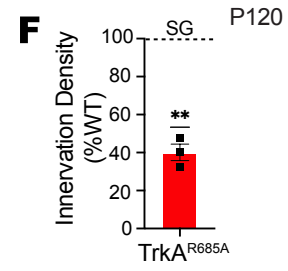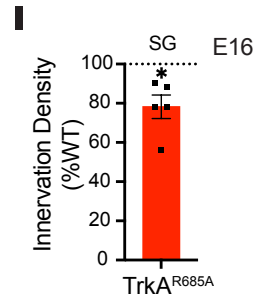

**Supplemental Figure S3. Sympathetic axon growth defects in TrkA<sup>R685A</sup> mice. Related to Figure 3. (A-C)** TH immunostaining of salivary glands and quantification of innervation density shows marked depletion of sympathetic innervation in P30 TrkA<sup>R685A</sup> mice compared to litter-mate controls. Scale bar: 100  $\mu$ m. **(D-F)** TH immunostaining and quantification of TH-positive nerves in salivary glands shows that the axon innervation deficit in 4-month old TrkA<sup>R685A</sup> mutant mice is similar to that in 1-month old mice (**S3C**). Scale bar: 100  $\mu$ m. **(G-I)** Immunostaining with a pan-neuronal marker, Tuj1, reveals a decrease in innervation in E16 salivary glands, compared to littermate controls. Nuclei are stained with DAPI (blue). Scale bar: 100  $\mu$ m. **(C, F, I)** Quantification of TH-positive or Tuj1 positive nerves by measuring integrated fluorescence densities per unit area using ImageJ. Results are mean  $\pm$  SEM from 3-4 mice per genotype and represented as % of TrkA<sup>WT</sup> values. One-sample t-test with hypothetical mean of 100%; \*p<0.05, \*\*p<0.01, \*\*\*p<0.001.

Pupillary Light Response

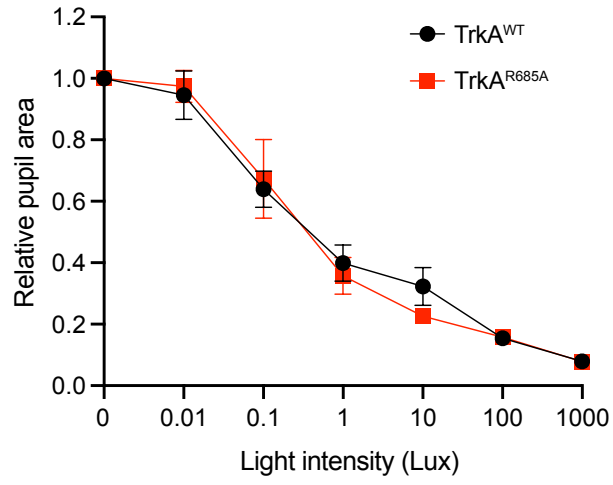



**Supplemental Figure S4. Autonomic function analysis. Related to Figure 5.**

Parasympathetic activity is normal in TrkA<sup>R685A</sup> mice as assessed by measuring pupil constriction in response to increasing light intensities. Data are mean  $\pm$  SEM from n=6 TrkA<sup>WT</sup> and 5 TrkA<sup>R685A</sup> animals.

## Supporting Information Materials and Methods:

### Key Resources Table:

| REAGENT or RESOURCE                                                                  | SOURCE                   | IDENTIFIER                          |
|--------------------------------------------------------------------------------------|--------------------------|-------------------------------------|
| Antibodies                                                                           |                          |                                     |
| Rabbit anti-P-TrkA <sup>Y785</sup>                                                   | Cell signaling           | Cat# 4168; RRID: AB_10620952        |
| Rabbit anti-P-TrkA <sup>Y674/675</sup>                                               | Cell Signaling           | Cat# 4621T; RRID: AB_916186         |
| Rabbit anti-P-TrkA <sup>Y490</sup>                                                   | Cell Signaling           | Cat# 9141L; RRID: AB_2298805        |
| Rabbit anti-P-Akt                                                                    | Cell signaling           | Cat# 9271; RRID: AB_329825          |
| Mouse anti-P-Erk1/2                                                                  | Cell signaling           | Cat# 9106 RRID: AB_331768           |
| Rabbit anti- p85 subunit of phosphatidylinositol-3-kinase                            | Millipore                | Cat# ABS234; RRID: AB_2714180       |
| Mouse anti-FLAG M2, IgG1                                                             | Sigma                    | Cat# F3165; RRID: AB_259529         |
| Mouse anti-Trk (B-3)                                                                 | Santa Cruz Biotechnology | Cat# sc-7268 RRID: AB_628397        |
| Rabbit anti-TrkA                                                                     | Millipore                | Cat# 06-574; RRID: AB_310180        |
| Mouse anti-β-III Tubulin (SDL.3D10), IgG2b                                           | Sigma                    | Cat# T8660; RRID: AB_477590         |
| Rabbit anti-TH                                                                       | Millipore                | Cat# AB152; RRID: AB_390204         |
| Rabbit anti-Cleaved Caspase 3                                                        | Cell Signaling           | Cat# 9661S; RRID: AB_2341188        |
| Mouse anti-β-III Tubulin (Tuj1)                                                      | R & D Systems            | Cat# MAB1195-SP RRID: AB_357520     |
| Rat anti-Ki67 monoclonal (SolA15)                                                    | Thermo Fisher Scientific | Cat# 14-5698-82 RRID: AB_10854564   |
| Mouse anti-p75                                                                       | Biosensis                | Cat# M-006-100 RRID: AB_2492395     |
| Rabbit anti-NGF                                                                      | Sigma                    | Cat# N6655; RRID: AB_477660         |
| Sheep anti-NGF                                                                       | Cedarlane                | Cat# CLMCNET-031; RRID: AB_10060173 |
| Amersham ECL Rabbit IgG, HRP-linked whole Ab (from donkey)                           | Cytvia Life Sciences     | Cat# NA934-1ML; RRID:               |
| Amersham ECL Mouse IgG, HRP-linked whole Ab (from sheep)                             | Cytvia Life Sciences     | Cat# NA931-1ML; RRID:               |
| Goat anti-Rabbit IgG (H+L) Highly Cross-Adsorbed Secondary Antibody, Alexa Fluor 488 | Thermo Fisher Scientific | Cat# A-11034; RRID: AB_2576217      |
| Goat anti-Mouse IgG2b Cross-Adsorbed Secondary Antibody, Alexa Fluor 546             | Thermo Fisher Scientific | Cat# A-21143; RRID: AB_2535779      |
| Goat anti-Mouse IgG1 Cross-Adsorbed Secondary Antibody, Alexa Fluor 546              | Thermo Fisher Scientific | Cat# A-21123; RRID: AB_2535765      |
|                                                                                      |                          |                                     |
| Bacterial and Virus Strains                                                          |                          |                                     |
| Adenovirus FLAG-TrkB:A <sup>F592A</sup> -P2A-GFP (WT)                                | 1                        | N/A                                 |

|                                                                        |                          |                  |
|------------------------------------------------------------------------|--------------------------|------------------|
| Adenovirus FLAG-TrkB:A <sup>F592A/R685A</sup> -P2A-GFP (R685A)         | 1                        | N/A              |
|                                                                        | 2                        |                  |
| <b>Biological Samples</b>                                              |                          |                  |
| NGF                                                                    | 3                        | N/A              |
| Cas9                                                                   | JHU Transgenic Core      | N/A              |
| Taq Polymerase                                                         | New England Biolabs      | Cat# M0273       |
|                                                                        |                          |                  |
| <b>Chemicals, Peptides, and Recombinant Proteins</b>                   |                          |                  |
| BceAI Restriction Enzyme                                               | New England Biolabs      | Cat# R0623S      |
| dNTP                                                                   | Thermo Fisher Scientific | Cat# R0181       |
| Collagenase Type II                                                    | Worthington              | Cat#             |
| Hyaluronidase                                                          |                          | Cat#             |
| DNaseI                                                                 |                          | Cat#             |
| Bovine Serum Albumin                                                   |                          | Cat#             |
| Doxycycline hyclate                                                    | Sigma-Aldrich            | Cat# D9891-5G    |
| Cytosine $\beta$ -D-arabinofuranoside hydrochloride                    | Sigma-Aldrich            | Cat# C6645-5G    |
| BDNF                                                                   | PeptoTech                | Cat# 450-02      |
| Protein G-Agarose Beads                                                | Santa Cruz               | Cat# sc-2002     |
| Complete Mini, EDTA-Free                                               | Roche                    | Cat# 11836170001 |
| Pierce Phosphatase inhibitor Mini tablets                              | Thermo Fisher Scientific | Cat# A32957      |
| Signal Enhancer HIKARI 250                                             | Nacalai                  | Cat# NU00102     |
| One Block Western-CL                                                   | Prometheus               | Cat# 20-313      |
| Dry Milk                                                               | Quality Biological       | Cat# A614-1005   |
| Restore PLUS Western Blot Stripping Buffer                             | Thermo Fisher Scientific | Cat# 46430       |
| Pierce ECL Plus                                                        | Thermo Fisher Scientific | Cat# 32132       |
| Cresyl Violet acetate                                                  | MilliporeSigma           | Cat# C5042-10G   |
| Gum Rosin                                                              | MilliporeSigma           | Cat# 60895-1KG   |
| boc-aspartyl(O-methyl)-fluoromethylketone (BAF)                        | BioVision                | Cat# 1160-5      |
| FluoSpheres™ Carboxylate-modified microspheres, 0.04 $\mu$ m (660/680) | ThermoFisher             | Cat# F8789       |
| DAPI                                                                   | Roche                    | Cat# 10236276001 |
|                                                                        |                          |                  |
| <b>Critical Commercial Assays</b>                                      |                          |                  |
| Adeno-XTM Adenoviral System 3 kit                                      | Clontech                 | Cat# 631180      |
| VivaPure AdenoPack20                                                   | Sartorius                | Cat# VS-AVPQ020  |
| PCR clean-up/ Gel extraction kit                                       | Macherey-Nagel           | Cat# 740609.250  |
| <i>In Situ</i> Cell Death Detection Kit, Fluorescein                   | Millipore Sigma          | Cat# 11684795910 |
|                                                                        |                          |                  |
| <b>Experimental Models: Cell Lines</b>                                 |                          |                  |
| HEK 293                                                                | ATCC                     | CRL-1573         |
|                                                                        |                          |                  |
| <b>Experimental Models: Organisms/Strains</b>                          |                          |                  |
| TrkA <sup>R685A</sup> knock-in mice                                    | This paper               | N/A              |
| Sprague Dawley rats                                                    | Taconic Biosciences      | SD-F             |

|                                                                               |                                |                                                                                                                                                                                   |
|-------------------------------------------------------------------------------|--------------------------------|-----------------------------------------------------------------------------------------------------------------------------------------------------------------------------------|
|                                                                               |                                |                                                                                                                                                                                   |
| <b>Oligonucleotides</b>                                                       |                                |                                                                                                                                                                                   |
| CRISPR guide RNA                                                              | This paper                     | N/A                                                                                                                                                                               |
| CRISPR HDR Template                                                           | This paper                     | N/A                                                                                                                                                                               |
| CRISPR transactivating RNA (tracr)                                            | JHU Transgenic Core            | N/A                                                                                                                                                                               |
| TrkA <sup>WT</sup> -R: 5'- AGGTTTAGGGACACTTACTCGG -3'                         | This paper                     | N/A                                                                                                                                                                               |
| TrkA <sup>R685A</sup> -R: 5'- AGGTTTAGGGACACTTACGGCA -3'                      | This paper                     | N/A                                                                                                                                                                               |
| TrkA <sup>Common</sup> -F: 5'- TCTCTCTGTCTCCGTCTTTCT -3'                      | This paper                     | N/A                                                                                                                                                                               |
| TrkA <sup>R685A(BceA1)</sup> -F: 5'- CCTAGTCTCTTCCTCCTCAAATC -3'              | This paper                     | N/A                                                                                                                                                                               |
| TrkA <sup>R685A(BceA1)</sup> -R: 5'- CCAGAGCTCACACTGCTAAA -3'                 | This paper                     | N/A                                                                                                                                                                               |
|                                                                               |                                |                                                                                                                                                                                   |
| <b>Recombinant DNA</b>                                                        |                                |                                                                                                                                                                                   |
| N/A                                                                           |                                |                                                                                                                                                                                   |
|                                                                               |                                |                                                                                                                                                                                   |
| <b>Hardware, Software and Algorithms</b>                                      |                                |                                                                                                                                                                                   |
| Campanot Chambers                                                             | Tyler Research Corp.           | Camp10                                                                                                                                                                            |
| DESKGEN CRISPR, Desktop Genetics <sup>TM</sup>                                | 4                              | <a href="https://www.deskgen.com/guidebook">https://www.deskgen.com/guidebook</a>                                                                                                 |
| CHOP CHOP                                                                     | 5                              | <a href="https://chopchop.cbu.uib.no">https://chopchop.cbu.uib.no</a>                                                                                                             |
| Edit-R HDR Donor Designer software                                            | Horizaon Discovery (Dharmacon) | <a href="https://horizondiscovery.com/en/ordering-and-calculation-tools/crispr-design-tool">https://horizondiscovery.com/en/ordering-and-calculation-tools/crispr-design-tool</a> |
| Sony 20.6 Megapixel 4K HD Video Recording FDRAX33 Handycam Camcorder DCR-HC96 | Amazon                         | N/A                                                                                                                                                                               |
| EXTECH Foot Candle/Lux Light Meter                                            | Grainger, Inc                  | Cat# 1H153                                                                                                                                                                        |
| Sunlite A19 Light Bulb, Daylight                                              | Amazon                         | N/A                                                                                                                                                                               |
| Sunlite 80599-SU LED A19 Super Bright Light Bulb, Daylight                    | Amazon                         | N/A                                                                                                                                                                               |
| Neutral Density Fillter (Roscolux)                                            | Chesapeake Lighting            | N/A                                                                                                                                                                               |
| ZEN 2012 SP1 (black edition)                                                  | N/A                            | <a href="https://www.zeiss.com/microscopy/int/home.html">https://www.zeiss.com/microscopy/int/home.html</a>                                                                       |
| ZEN 2012 (blue edition)                                                       | N/A                            | <a href="https://www.zeiss.com/microscopy/int/home.html">https://www.zeiss.com/microscopy/int/home.html</a>                                                                       |
| ImageJ                                                                        | N/A                            | <a href="https://imagej.nih.gov/ij/">https://imagej.nih.gov/ij/</a>                                                                                                               |
| Prism 9                                                                       | GraphPad                       | <a href="https://www.graphpad.com/">https://www.graphpad.com/</a>                                                                                                                 |
| Adobe Illustrator                                                             | Adobe                          | <a href="https://www.adobe.com">https://www.adobe.com</a>                                                                                                                         |

#### References:

- 1 Yamashita, N., Joshi, R., Zhang, S., Zhang, Z. Y. & Kuruvilla, R. Phospho-Regulation of Soma-to-Axon Transcytosis of Neurotrophin Receptors. *Developmental cell* **42**, 626-639 e625 (2017). <https://doi.org:10.1016/j.devcel.2017.08.009>

- 2 Ascano, M., Richmond, A., Borden, P. & Kuruvilla, R. Axonal targeting of Trk receptors via transcytosis regulates sensitivity to neurotrophin responses. *The Journal of neuroscience : the official journal of the Society for Neuroscience* **29**, 11674-11685 (2009). <https://doi.org/10.1523/JNEUROSCI.1542-09.2009>
- 3 Mobley, W. C., Schenker, A. & Shooter, E. M. Characterization and isolation of proteolytically modified nerve growth factor. *Biochem.* **15**, 5543-5551 (1976).
- 4 Hough, S. H., Ajetunmobi, A., Brody, L., Humphryes-Kirilov, N. & Perello, E. Desktop Genetics. *Per Med* **13**, 517-521 (2016). <https://doi.org/10.2217/pme-2016-0068>
- 5 Labun, K., Montague, T. G., Gagnon, J. A., Thyme, S. B. & Valen, E. CHOPCHOP v2: a web tool for the next generation of CRISPR genome engineering. *Nucleic Acids Res* **44**, W272-276 (2016). <https://doi.org/10.1093/nar/gkw398>
